# Supplementary material
Source: Research Square preprint supplement (doi:10.21203/rs.3.rs-9217404/v1)
Supplement: Supplementary file 1 [file 449b69190fa3353a070c8878.docx]

|  | Total (N = 211) | Steroid  (N = 92) | Non-steroid  (N = 119) | *p*-value |
| --- | --- | --- | --- | --- |
| Age at onset (month)  (median) | 6.08 (0.3 — 16.3) | 6.08 (2.0 — 16.3) | 6 (0.3 — 14.9) | 0.558 |
| Male | 114 (54) | 53 (57.6) | 61 (51.3) | 0.404 |
| Body weight (kg),  mean ± SD | 25.11 ± 12.52 | 24.95 ± 11.81 | 25.23 ± 13.1 | 0.875 |
| Clinical manifestation |  |  |  |  |
| Purpura | 204 (96.7) | 87 (94.6) | 117 (98.3) | 0.244 |
| GI symptom | 81 (38.4) | 68 (73.9) | 13 (10.9) | 0.002 |
| Arthralgia | 116 (55) | 62 (67.4) | 54 (45.4) | < 0.001 |
| Laboratory finding |  |  |  |  |
| WBC (x103/µL) | 10.78 ± 4.15 | 11.65 ± 4.05 | 10.11 ± 4.11 | 0.007 |
| Hb (g/dL) | 12.93 ± 1.04 | 13.05 ± 1.03 | 12.84 ± 1.04 | 0.140 |
| Platelet (x103/µL) | 431.39 ± 514.83 | 464.78 ± 600.96 | 405.58 ± 437.77 | 0.427 |
| ESR (mm/hr) | 19.25 ± 16 .97 | 22.52 ± 16.96 | 16.08 ± 16.5 | 0.030 |
| CRP (mg/dL) | 0.73 ± 0.97 | 0.98 ± 1.12 | 0.54 ± 0.8 | 0.001 |
| Creatinine (mg/dL) | 0.42 ± 0.11 | 0.41 ± 0.11 | 0.42 ± 0.12 | 0.401 |
| ANA positivity (%) | 48 (22.7) | 17 (18.5) | 31 (26.1) | 0.080 |
| Kidney involvement (%) | 34 (16.1) | 20 (21.7) | 14 (11.8) | 0.054 |

Table 1. Baseline characteristics of included patients

Data are presented as mean ± standard deviation for continuous variables and n(%) for categorical variables, unless indicated otherwise.

Abbreviations: SD, standard deviation; HSP, Henoch schonlein purpura; WBC,white blood cell; Hb,hemoglobin; ESR, erythrocyte sedimentation rate; CRP, C-reactive protein; ANA. Antinuclear antibody;
