# Supplementary material
Source: Research Square preprint supplement (doi:10.21203/rs.3.rs-9217404/v1)
Supplement: Supplementary file 2 [file 4e8e5f258542d8392f342973.docx]

**Table 3. Outcome of kidney involvement**

|  | Steroid  (N = 20) | Non-steroid  (N = 14) | *p-*value | OR (95% CI) |
| --- | --- | --- | --- | --- |
| Normalization of urine, n (%) | | |  |  |
| Full+Partial normalization | 16 (80.0) | 12 (85.7) | 0.317 | 0.308 (0.031—3.101)) |
| Full normalization | 7 (35.0) | 8 (57.1) | 0.205 | 0.404 (0.099—1.640) |
| Time to full normalization, median (mo, range) | 1.40  (0.10 — 7.70) | 5.75  (2.63—13.13) | 0.475 | 1.081 (0.873—1.338) |
| Normalization by patterns of kidney involve, n (%) | | | | |
| Isolated mHU | 3/5 (60.0) | 4/6 (66.7) | 1.000 | 0.750 (0.064—8.834) |
| Isolated mild PU | 0/1 (0.0) | 1/1 (100.0) | 1.000 | NA |
| mHU + mild PU | 5/10 (50.0) | 1/3 (33.3) | 1.000 | 2.000 (0.134—29.809) |
| mHU + moderate PU | 0/4 (0.0) | 3/4 (75.0) | 0.143 | NA |
| Additional treatment | | |  |  |
| RAAS inhibitor, n (%) | 9 (45.0) | 6 (42.9) | 0.901 | 1.091(0.275—4.324) |
| Immunosuppressant | 2 (10.0) | 1 (7.1) | 0.773 | 1.444 (0.118—17.671) |

Abbreviations: OR,odds ratio; CI, confidence interval; mHU,microscopic hematuria; PU,proteinuria; mild PU < Protein/Cr ratio (urine) < 1000 mg/g; moderate PU ≥ 1000 mg/g; NA; not applicable, RAAS; renin-angiotensin-aldosterone system
