# Supplementary material
Source: Research Square preprint supplement (doi:10.21203/rs.3.rs-9217404/v1)
Supplement: Supplementary file 3 [file e83709c53c0f1e74afa27fb2.docx]

**Table 2. Comparison of kidney involvement between steroid and non-steroid groups**

|  | | Steroid  (N = 92) | Non-steroid  (N = 119) | *p-*value | OR (95% CI) |
| --- | --- | --- | --- | --- | --- |
| Kidney involvement | | | |  |  |
| Number, n (%) | 20 (21.7) | | 14 (11.8) | 0.054 | 2.083 (0.988 — 4.392) |
| Time to onset (mo)  (Median) | 1.03  (0.0 — 19.3) | | 0.72  (0 — 3.17) | 0.166 | 0.685 (0.401 — 1.170) |
| Patterns of kidney involvement | | | |  |  |
| Isolated mHU | 5 (5.4) | | 6 (5) | 0.899 | 1.082 (0.320 — 3.664) |
| Isolated mild PU | 1 (1.1) | | 1 (0.8) | 0.855 | 1.297 (0.080 — 21.012) |
| mHU + mild PU | 10 (10.9) | | 3 (2.5) | 0.021 | 4.715(1.259 — 17.667) |
| mHU + moderate PU | 4 (4.3) | | 4 (3.4) | 0.699 | 1.322 (0.322 — 5.434) |
| Kidney biopsy, n (%) | 1 (1.1) | | 2 (1.7) |  |  |
| Hass Classification | Ⅲ | | Ⅲ, Ⅲ | NA | NA |
| Oxford classification | M0 E0 S1 T0 C1 | | M0 E0 S0 T0 C0  M0 E0 S0 T0 C0 | NA | NA |

Abbreviations: OR,odds ratio; CI, confidence interval; mHU,microscopic hematuria; PU,proteinuria; mild PU < Protein/Cr ratio (urine) < 1000 mg/g; moderate PU ≥ 1000 mg/g; NA; not applicable
